# Supplementary material for: Chromatin Structure and “DNA Sequence View”: The Role of Satellite DNA in Ectopic Pairing of the Drosophila X Polytene Chromosome
Source: MDPI journal article supplement (doi:10.3390/ijms22168713), 2021-08-13
Supplement: s1 [file s1]

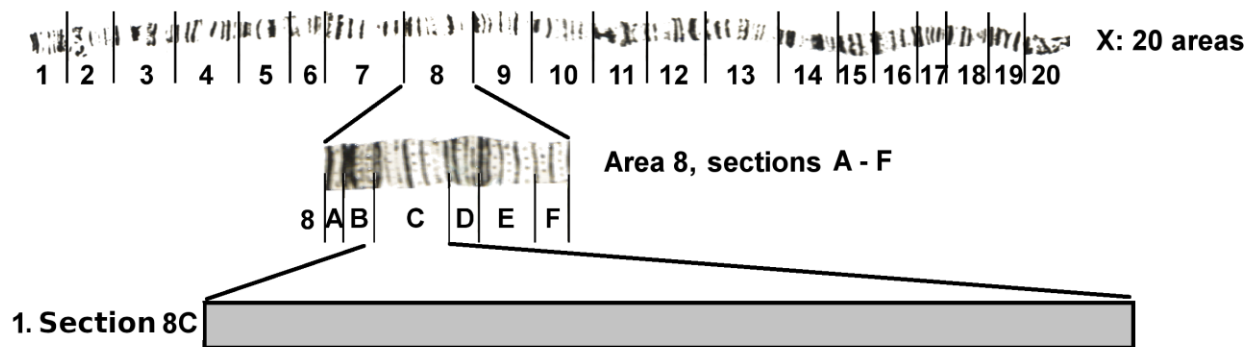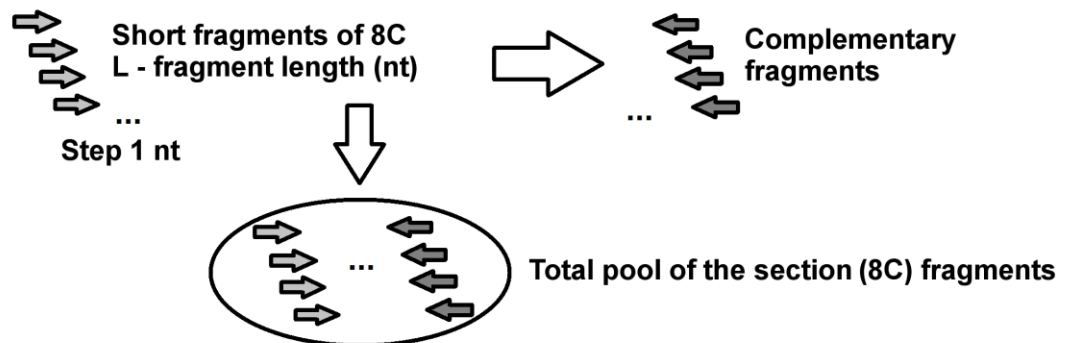

## 2. Aho-Corasick search

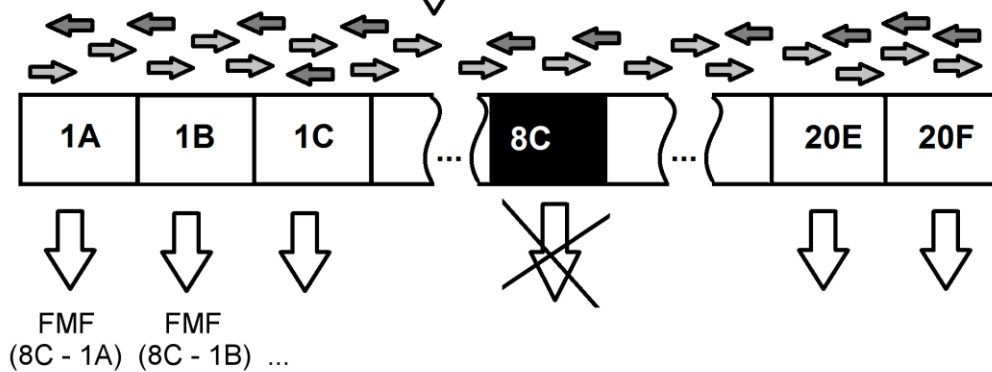

## 3. FMF calculation

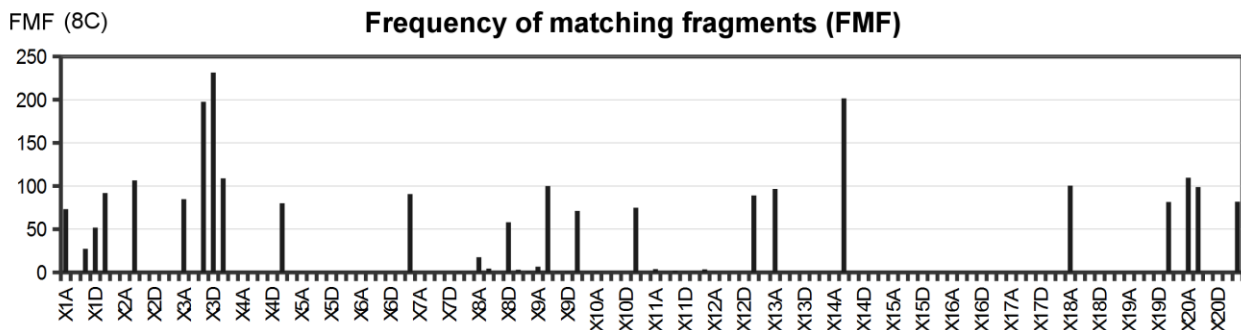

## 4. Repeat 1.-3. for all sections except 20B

### 5. a. FEC - FMF correlation calculation

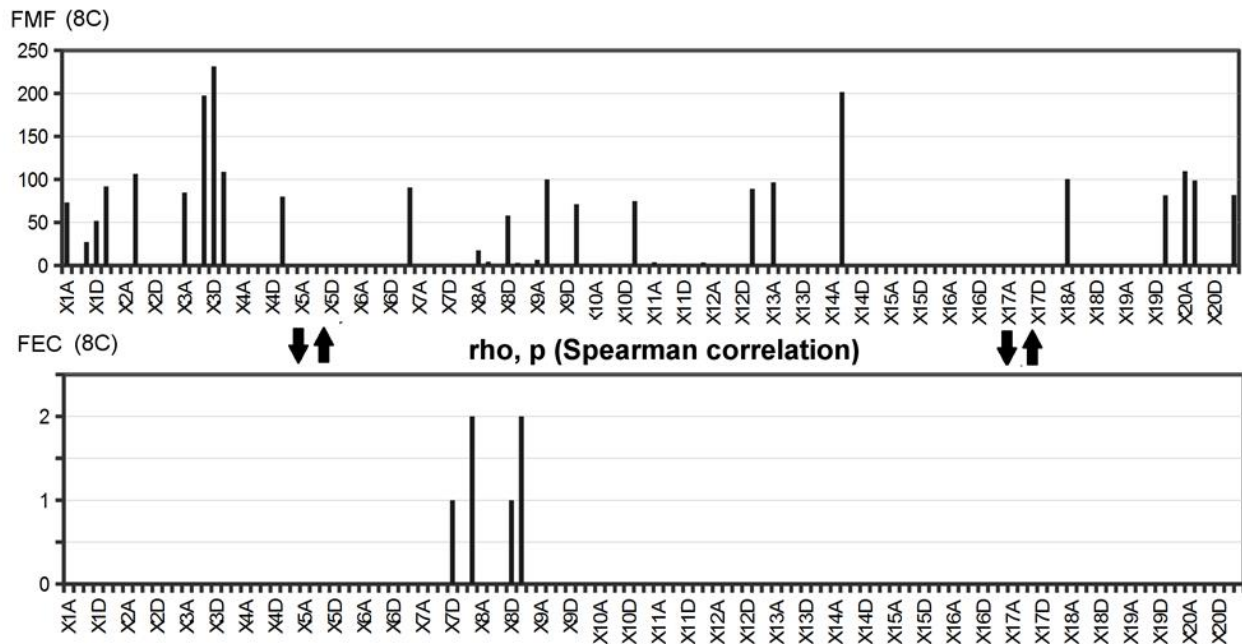

Repeat for all sections except 20B

b. R: the average rho value of significant Spearman correlations ( $p < 0.05$ )

P: the proportion of significant correlations

### 6. Unspecific FEC - FMF correlation calculation (for all different sections)

7. Repeat 1. - 6. for all fragment lengths (L)

8. Repeat 1. - 7. for fragments excluding DNA repeats

### 9. Sections proximity influence on FEC - FMF correlation

a. Zones of D length (D: 10 - 116)

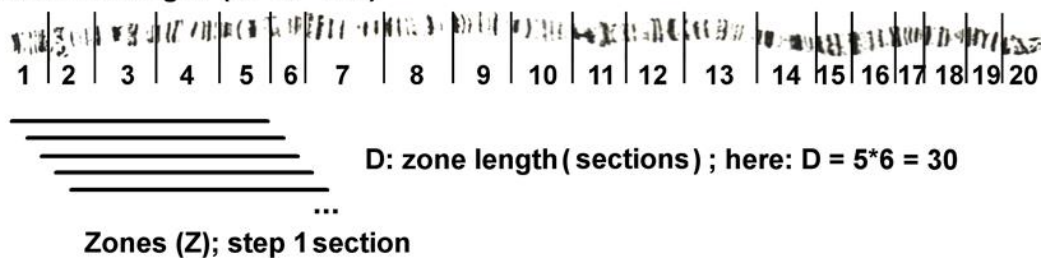

b. Calculate the average values of R and P for all zones of D length

Repeat 9. for all D
